# Supplementary material
Source: PubMed Central journal article supplement (PMC9694570)
Supplement: 12884_2022_5182_MOESM1_ESM.pdf [file 12884_2022_5182_MOESM1_ESM.pdf]

## **Case definitions of maternal infections**

### **Suspected infection:**

A woman (with suspected infection) has “Infections WITH complications” IF: The woman has any of the following (to treat the source of infection): Laparotomy and lavage, Incision and drainage, Hysterectomy, Vacuum aspiration, Percutaneous drainage, Wound debridement, Culdotomy/Colpotomy/Culdocentesis, Dilatation and curettage, Removal of infected cannula/line, Any other surgery

### **OR**

The woman has any of the following condition:

Shock, Cardiac Arrest, Severe hypoperfusion, Severe acidosis, Use of continuous vasoactive drugs, Cardio-pulmonary resuscitation, Acute cyanosis, Gaspings, Severe tachypnea, Severe bradypnea, Severe hypoxemia, Intubation and ventilation not related to anaesthesia, Oliguria non responsive to fluids or diuretic, Severe acute azotemia, Dialysis for acute renal failure, Failure to form clots, Severe acute thrombocytopenia, iver transfusion of blood or red cells, Jaundice in the presence of preeclampsia, Severe acute hyperbilirubinemia, Prolonged unconsciousness or coma, Stroke, Uncontrollable fit/status epilepticus, global paralysis, Hysterectomy due to uterine infection or haemorrhage

### **OR**

Woman was admitted to ICU or high dependency care

### **OR**

Woman was transferred to another facility

### **OR**

Related infection death

Otherwise, the woman with suspected infection has “Infections WITHOUT complications”

### **Infection with complication:**

A woman with an infection with complications has “Severe maternal outcomes related to infection (SMO)” IF: The woman has any of the following condition:

Shock, Cardiac Arrest, Severe hypoperfusion, Severe acidosis, Use of continuous vasoactive drugs, Cardio-pulmonary resuscitation, Acute cyanosis, Gaspings, Severe tachypnea, Severe bradypnea, Severe hypoxemia, Intubation and ventilation not related to anaesthesia, Oliguria non responsive to fluids or diuretic, Severe acute azotemia, Dialysis for acute renal failure, Failure to form clots, Severe acute thrombocytopenia, iver transfusion of blood or red cells, Jaundice in the presence of preeclampsia, Severe acute hyperbilirubinemia, Prolonged unconsciousness or coma, Stroke, Uncontrollable fit / status epilepticus, Global paralysis, Hysterectomy due to uterine infection or haemorrhage

### **OR**

Related infection death

Otherwise, the woman (with an infection with complications) has “Non severe maternal outcomes related to infection (NON SMO)”

### **SMO:**

A woman with a SMO has an “Infection related Near Miss” IF: The woman has any of the following condition:

Shock, Cardiac Arrest, Severe hypoperfusion, Severe acidosis, Use of continuous vasoactive drugs, Cardio-pulmonary resuscitation, Acute cyanosis, Gaspings, Severe tachypnea, Severe

bradipnea, Severe hypoxemia, Intubation and ventilation not related to anaesthesia, Oliguria non responsive to fluids or diuretic, Severe acute azotemia, Dialysis for acute renal failure, Failure to form clots, Severe acute thrombocytopenia, i.e. transfusion of blood or red cells, Jaundice in the presence of preeclampsia, Severe acute hyperbilirubinemia, Prolonged unconsciousness or coma, Stroke, Uncontrollable fit/status epilepticus, Global paralysis, Hysterectomy due to uterine infection or haemorrhage, Otherwise, the woman has an "Infection related Maternal Death"
